# Supplementary material for: Polyimide nanocomposites with boron nitride-coated multi-walled carbon nanotubes for enhanced thermal conductivity and electrical insulation
Source: Royal Society of Chemistry journal article supplement (doi:10.1039/c4ta04663c), 2014-01-01
Supplement: c4ta04663c1.pdf [file c4ta04663c1.pdf]

## Supplementary Information

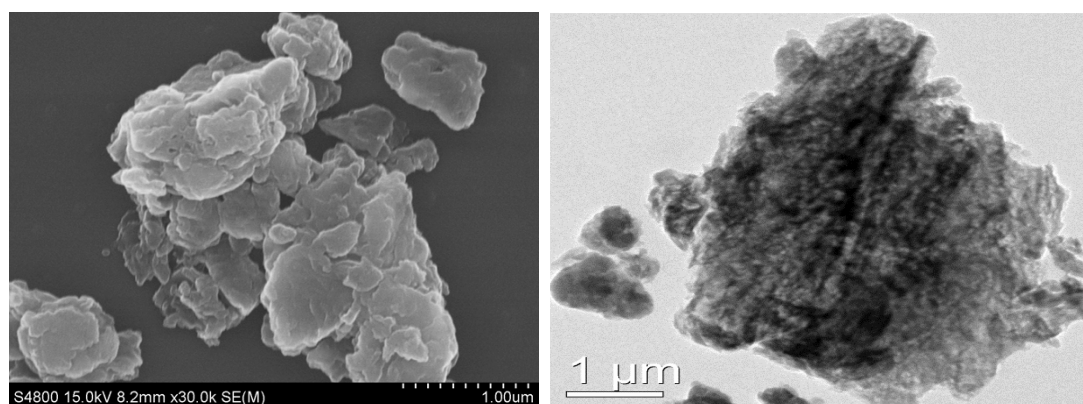

**Fig. S1** TEM and SEM images of boron nitride at 900 °C for 3 h under  $\text{NH}_3$  atmosphere.

**Table S1** The effect of filler content on electrical resistivity of the PI nanocomposite films.

| Sample             | Content(wt%) | Volume resistance<br>( $\Omega/\text{cm}^2$ ) | Surface resistance<br>( $\Omega\text{ cm}$ ) |
|--------------------|--------------|-----------------------------------------------|----------------------------------------------|
| Neat-PI            | 0            | $3.77 \times 10^{14}$                         | $1.17 \times 10^{13}$                        |
| MWCNTs/PI          | 0.1          | $3.69 \times 10^{14}$                         | $2.78 \times 10^{12}$                        |
|                    | 1            | $1.66 \times 10^{11}$                         | $1.48 \times 10^{10}$                        |
|                    | 3            | $6.82 \times 10^7$                            | $2.31 \times 10^7$                           |
| BN-c-MWCNTs/<br>PI | 0.1          | $3.84 \times 10^{14}$                         | $8.14 \times 10^{12}$                        |
|                    | 1            | $4.51 \times 10^{14}$                         | $4.49 \times 10^{11}$                        |
|                    | 3            | $7.69 \times 10^9$                            | $3.82 \times 10^9$                           |

**Table S2** Thermal conductivity of the MWCNTs/PI and BN-c-MWCNTs/PI nanocomposite films.

| Sample    | Content (wt%) | $\alpha$ (mm <sup>2</sup> /s) <sup>a</sup> | $\rho$ (g/cm <sup>-3</sup> ) <sup>b</sup> | $c_p$ (J/gK) <sup>c</sup> | $\lambda$ (W/mK) <sup>d</sup> |
|-----------|---------------|--------------------------------------------|-------------------------------------------|---------------------------|-------------------------------|
| Neat-PI   | 0             | 0.141                                      | 1.268                                     | 1.049                     | 0.188                         |
| MWCNTs/PI | 0.1           | 0.204                                      | 1.311                                     | 1.146                     | 0.306                         |
|           | 1             | 0.165                                      | 1.364                                     | 1.112                     | 0.250                         |
|           | 3             | 0.175                                      | 1.373                                     | 0.993                     | 0.239                         |
| BN-c-     | 0.1           | 0.211                                      | 1.301                                     | 1.146                     | 0.315                         |
| MWCNTs/   | 1             | 0.204                                      | 1.467                                     | 1.067                     | 0.319                         |
| PI        | 3             | 0.222                                      | 1.498                                     | 1.167                     | 0.388                         |

<sup>a</sup> $\alpha$ : Thermal diffusivity, <sup>b</sup> $\rho$ :Density, <sup>c</sup> $c_p$ : Specific heat capacity, <sup>d</sup> $\lambda$ :Thermal conductivity.
